# Supplementary material
Source: PubMed Central journal article supplement (PMC6830503)
Supplement: NIHMS1053330-supplement-Suporting_Information.pdf [file NIHMS1053330-supplement-Suporting_Information.pdf]

# Supporting Information

## Arsenoplatin-1 Is a Dual Pharmacophore Anticancer Agent

Đenana Miodragović,<sup>†,§</sup> Antonello Merlino,<sup>\*,‡</sup> Elden P. Swindell,<sup>†</sup> Abraham Bogachkov,<sup>†</sup> Richard W. Ahn,<sup>†</sup> Sara Abuhadba,<sup>§</sup> Giarita Ferraro,<sup>#</sup> Tiziano Marzo,<sup>−</sup> Andrew P. Mazar,<sup>||</sup> Luigi Messori<sup>\*,#</sup> and Thomas V. O'Halloran<sup>\*,†</sup>

<sup>†</sup>Chemistry of Life Processes Institute, Northwestern University, 2145 Sheridan Road, Evanston, Illinois 60208, United States

<sup>‡</sup>Department of Chemical Sciences, University of Naples Federico II, Complesso Universitario di Monte Sant'Angelo, Via Cintia, I-80126 Napoli, Italy

<sup>§</sup>Northeastern Illinois University, 5500 North St Louis Avenue, Chicago, Illinois 60625, United States

<sup>||</sup>Pharmacology, Feinberg School of Medicine, Northwestern University, 2145 Sheridan Road, Evanston, Illinois 60208, United States

<sup>−</sup>Department of Pharmacy, University of Pisa, Via Bonanno Pisano 6, 56126, Pisa, Italy

<sup>#</sup>Department of Chemistry 'Ugo Schiff', Università degli Studi Firenze, via della Lastruccia, 3-13, 50019 Sesto Fiorentino, Italy

### Corresponding Authors:

[antonello.merlino@unina.it](mailto:antonello.merlino@unina.it)

[luigi.messori@unifi.it](mailto:luigi.messori@unifi.it)

[t-ohalloran@northwestern.edu](mailto:t-ohalloran@northwestern.edu)

| <b>Table of Contents</b>                                                                                | <b>Page</b> |
|---------------------------------------------------------------------------------------------------------|-------------|
| <b>Solubility and Stability of Arsenoplatin-1</b>                                                       | S3          |
| <b>Figure S1:</b> $^1\text{H}$ NMR spectra of AP-1 in DMSO- $d_6$                                       | S4          |
| <b>Figure S2:</b> UV/Vis spectra of AP-1 in PBS                                                         | S5          |
| <b>Figure S3:</b> $^{195}\text{Pt}$ NMR spectrum of AP-1 in $\text{CH}_3\text{OH}-d_4$                  | S6          |
| <b>NCI-60 human tumor cell lines screen</b>                                                             | S7          |
| <b>Figure S4:</b> One dose mean graph for Arsenoplatin-1 (AP-1)                                         | S8          |
| <b>Figure S5:</b> One dose mean graph for Cisplatin                                                     | S9          |
| <b>Figure S6:</b> One dose mean graph for Arsenic Trioxide                                              | S10         |
| <b>Figure S7:</b> AP-1 vs $\text{As}_2\text{O}_3$ response in the NCI-60 screen                         | S11         |
| <b>Figure S8:</b> AP-1 vs Cisplatin response in the NCI-60 screen                                       | S11         |
| <b>ESI MS spectra</b>                                                                                   | S12         |
| <b>Figure S9:</b> Isotope pattern theoretical simulation and<br>ESI -MS spectrum of AP-1-RNase A adduct | S12-S13     |
| <b>Crystallographic data</b>                                                                            | S14         |
| <b>Figure S10.</b> Arsenoplatin-1-Lysozyme adduct – ribbon representation of structure (5NJ1)           | S15         |
| <b>Catalytic Activity Assay</b>                                                                         | S16         |
| <b>Figure S11:</b> Hydrolysis of yeast RNA by RNase A and by RNase A-AP-1 adduct                        | S16         |
| <b>DNA isolation using the DNazol Reagent</b>                                                           | S17         |
| <b>Dose Response Studies</b>                                                                            | S18         |
| <b>Synergy Calculations</b>                                                                             | S18         |
| <b>Table S1:</b> $^{195}\text{Pt}$ NMR chemical shifts                                                  | S19         |
| <b>Table S2:</b> $\text{IC}_{50}$ data from synergy studies                                             | S19         |
| <b>Table S3:</b> Data collection statistics                                                             | S20         |
| <b>Table S4:</b> Refinement statistics                                                                  | S21         |
| <b>Table S5:</b> Lipinski rule of five and $\text{Log}P$ values                                         | S22         |
| <b>References</b>                                                                                       | S23-S24     |

## Solubility and Stability of Arsenoplatin-1

Arsenoplatin-1 is highly soluble in DMSO and in CH<sub>3</sub>OH. DMSO solutions of candidate drug compounds are employed in many biological assays, including in the NCI-60 screen used here. We evaluated the stability of AP-1 in DMSO-d<sub>6</sub> in the 48h time period (Figure S1). The <sup>1</sup>H NMR chemical shifts for AP-1 dissolved in DMSO do not change and no new peaks were observed over a 48h period at 25°C. These observations support the argument that the Pt-Cl bond in AP-1 does not undergo solvolysis in DMSO. A comparison of the <sup>195</sup>Pt NMR spectra for AP-1 in DMSO-d<sub>6</sub><sup>1</sup> and methanol-d<sub>4</sub> (Figure S3) reveals a chemical shift difference of 36 ppm which is much smaller than the difference expected if DMSO replaced chloride in a Pt(II) compound: <sup>195</sup>Pt chemical shifts undergo an upfield shift of between 850-1,000 ppm when DMSO is substituted for chloride ion<sup>12</sup> (Table S1). Based on these results, we conclude that AP-1 is stable, with the Pt-Cl bond remaining intact, in DMSO solutions at 25°C over a 48h period.

Arsenoplatin 1 is slightly soluble in aqueous buffers, and it is stable in PBS (pH=7.4) solution for more than 48h (Figure S2).

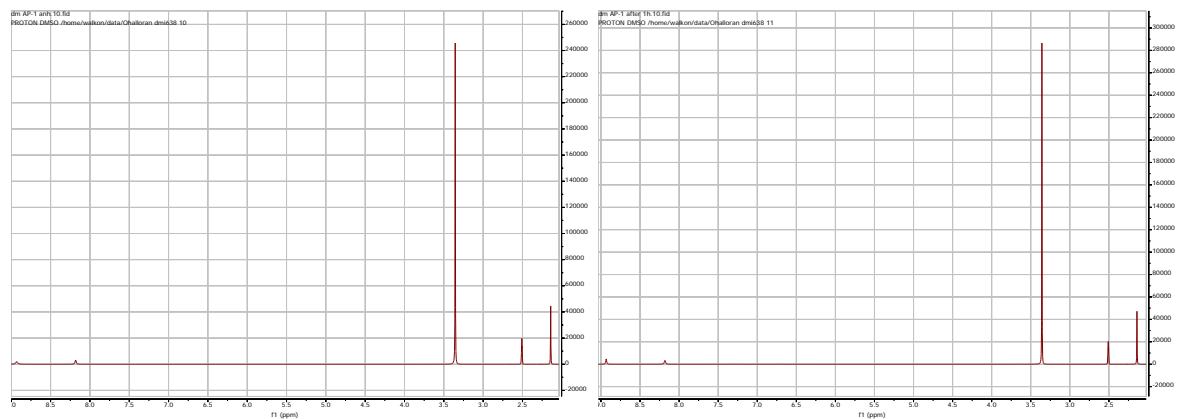

**A**

**B**

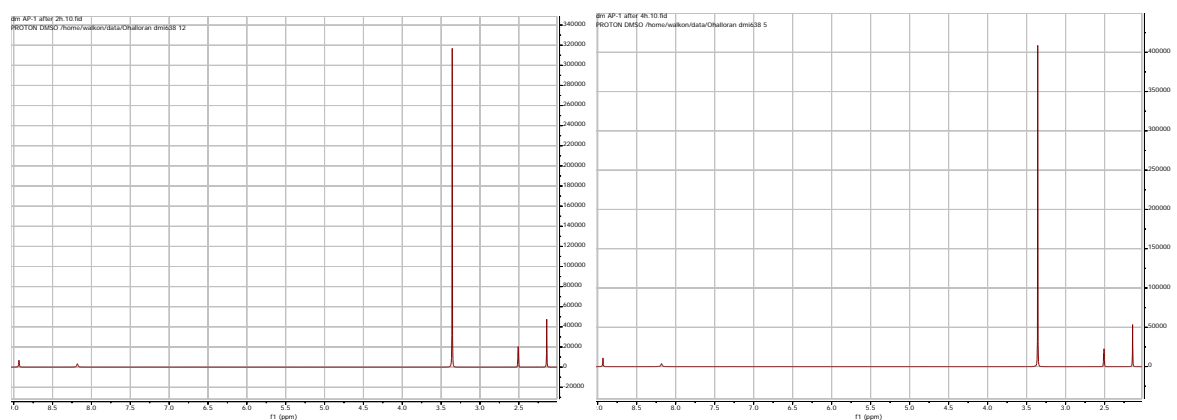

**C**

**D**

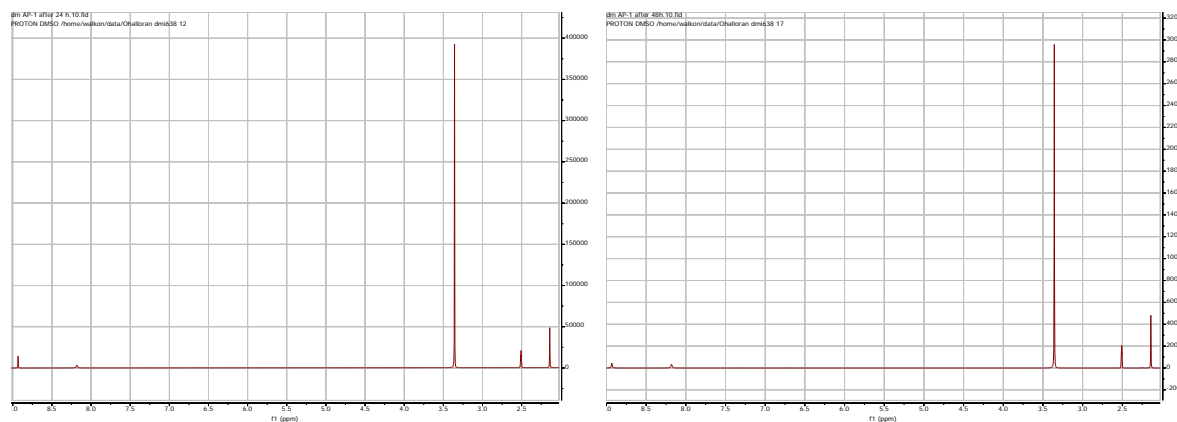

**E**

**F**

**Figure S1.** <sup>1</sup>H NMR spectrum of AP-1 in [D<sub>6</sub>]DMSO solution, acquired at 500 MHz at 25 °C; <sup>1</sup>H referenced to residual [D<sub>5</sub>H]DMSO at 2.50 ppm: **A**) after 15 min, **B**) after 1h, **C**) after 2h, **D**) after 4h, **E**) after 24h and **F**) after 48h at 25°C. (Chemical shifts in all spectra: 8.93 ppm (s, 2H-OH); 8.18 ppm (s, 2H-NH); 2.14 ppm (s, 6H-CH<sub>3</sub>).

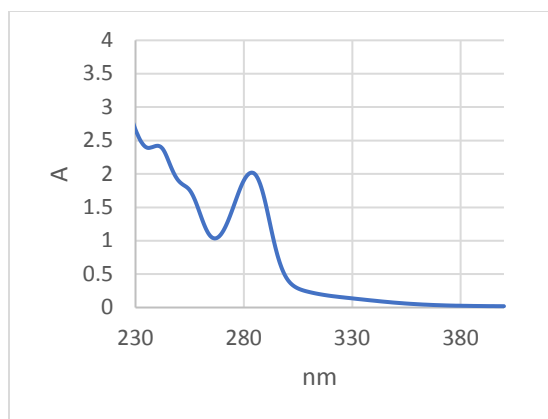

**A)**

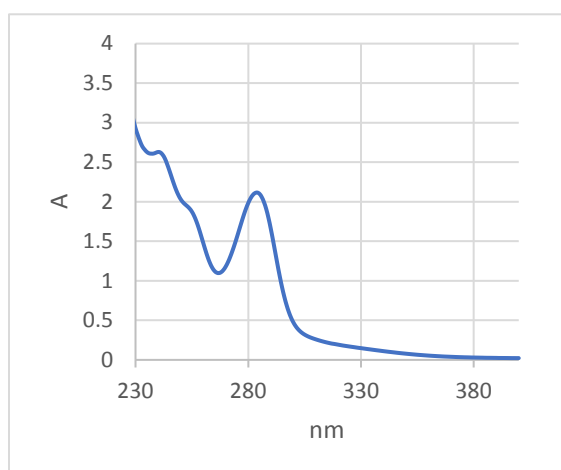

**B)**

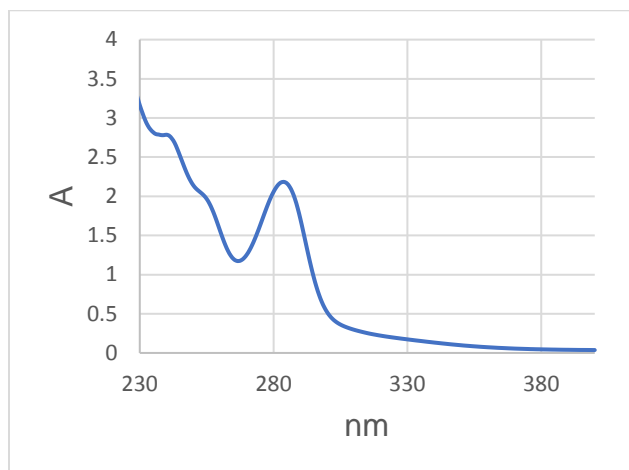

**C)**

**Figure S2.** AP-1 is slightly soluble in buffered solutions: in phosphate buffered saline (PBS) at pH = 7.4 solubility is 5 mg/mL and in saline alone (0.9 % NaCl) solubility is 4.5 mg/mL. Electronic absorption spectra indicate buffered solutions of AP-1 are stable over a 48h period: UV/Vis spectra of AP-1 dissolved in PBS (pH = 7.4) at 22°C (conc. 1 mg AP-1/5 ml PBS): A) after dissolving, B) after 24h, and C) after 48h. The maxima are at the same wavelengths in all spectra:  $\lambda_1 = 284$  nm (sh. at 255 nm) and  $\lambda_2$  at 240 nm. The slightly higher absorbance in the second and the third spectrum is due to slow evaporation of the solvent.

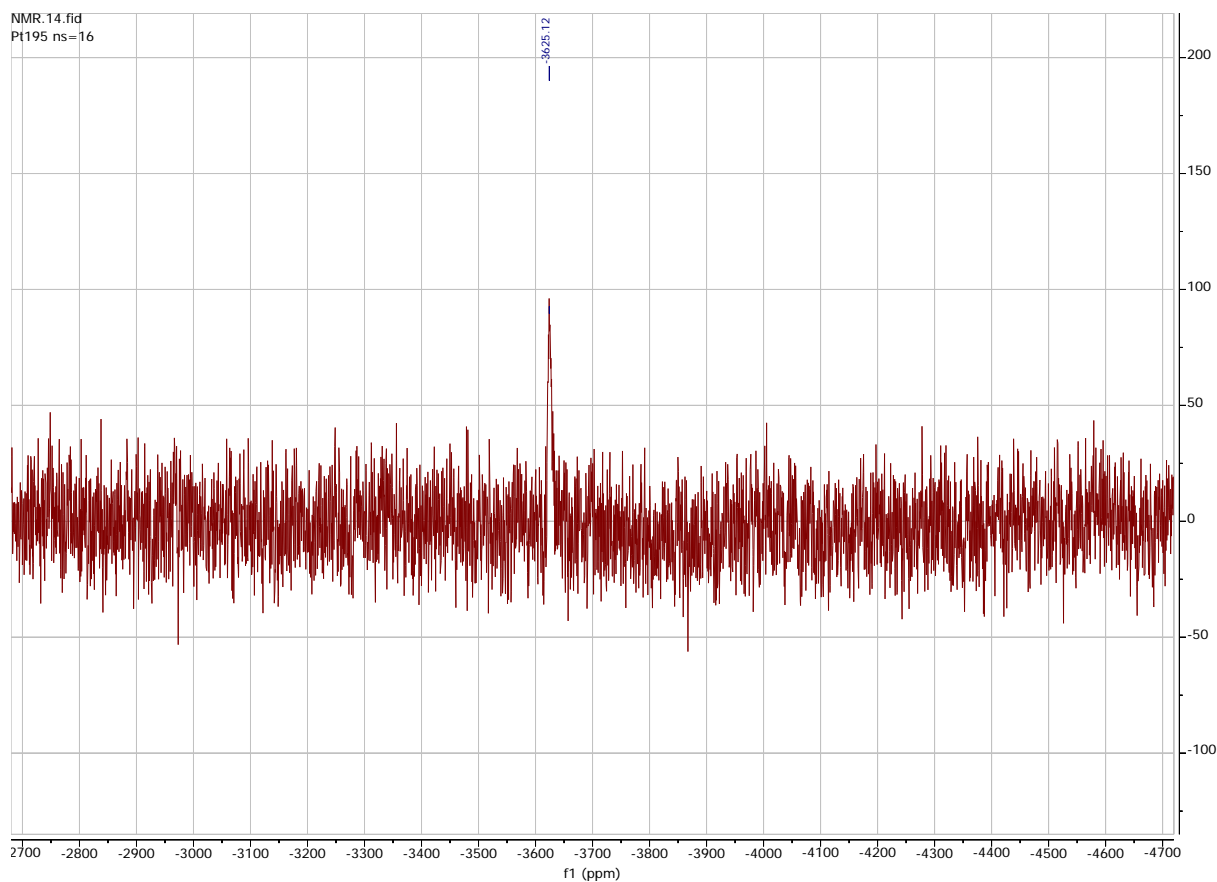

**Figure S3.**  $^{195}\text{Pt}$  NMR spectrum of AP-1 acquired at 129 MHz (600 MHz  $^1\text{H}$ ) in  $\text{CH}_3\text{OH-d}_4$  solution at 25 °C ( $^{195}\text{Pt}$  NMR chemical shifts were referenced indirectly to TMS in  $^1\text{H}$  NMR spectrum such that  $\text{K}_2^{195}\text{PtCl}_6$  in  $\text{D}_2\text{O}$  would resonate at 0.0 ppm).  $\delta = -3625$  (s, 1Pt).

The  $^{195}\text{Pt}$  (129 MHz) NMR spectrum was acquired on a 600 MHz ( $^1\text{H}$ ) Bruker Avance III spectrometer equipped with BBFO smart probe.

## NCI-60 Human Tumor Cell Lines Screen

NCI-60 screen is performed at the Developmental Therapeutics Core at Northwestern University.

### Cell lines:

Leukemia: CCRF-CEM, HL-60(TB), K-562, MOLT-4, RPMI-8226 and SR

Non-Small Cell Lung: A549/ATCC, EKVX, HOP-62, HOP-92, NCI-H226, NCI-H23, NCI-H322M, NCI-H460 and NCI-H522

Colon: COLO 205, HCC-2998, HCT-116, HCT-15, HT29, KM12 and SW-620

CNS: SF-268, SF-295, SF-539, SNB-19, SNB-75 and U251

Melanoma: LOX IMVI, MALME-3M, M14, MDA-MB-435, SK-MEL-2, SK-MEL-28, SK-MEL-5, UACC-257 and UACC-62

Ovarian: IGR-OV1, OVCAR-3, OVCAR-4, OVCAR-5, OVCAR-8, NCI/ADR-RES and SK-OV-3

Renal: 786-0, A498, ACHN, CAKI-1, RXF 393, SN12C, TK-10 and UO-31

Prostate: PC-3 and DU-145

Breast: MCF7, MDA-MB-231/ATCC, MDA-MB-468, HS 578T, BT-549 and T-47D

Media: The cells were cultured in RPMI 1640 media supplemented with 10% Fetal Bovine Serum (FBS), 2mM glutamine and with 5% CO<sub>2</sub> and 37<sup>0</sup>C. For the experiment, 5% of FBS and 50 ug/mL of gentamycin were used.

**Compounds tested:** 10 µM solutions of AP-1, Cisplatin, and Arsenic Trioxide. The drugs and AP-1 were dissolved in DMSO and then diluted with media so that the final concentration of the drugs and AP-1 was 10 µM, and the final concentration of DMSO in the wells with the drugs and AP-1, as well as in the control wells, was 0.1%.

**Study:** Cells were plated in 96 well plates in triplicate at the densities based on NCI recommendation. Time zero cells (Tz) will be fixed the following day with 50% (for adherent cells) or 80% (for suspension cells) ice cold trichloroacetic acid (TCA) and washed 5x with water. At 48 hours post addition of treatments, all remaining plates were fixed in 80% ice cold trichloroacetic acid (TCA) and washed 5x with water. After drying, one hundred microliters of 0.4% Sulphorhodamine B (SRB) in 1% acetic acid was added to each plate including the Tzero plate and incubated for 10 minutes at room temperature. After 5 additional washes with 1% acetic acid, plates were allowed to dry. One hundred microliters of Trizma base was added to each well and plates were read at 515 nm. Results obtained were submitted to the NCI and the COMPARE algorithm was used to generate the one dose mean graphs for AP-1, Cisplatin, and Arsenic Trioxide.

Developmental Therapeutics Program Mean Graph  
Selected Data Vectors

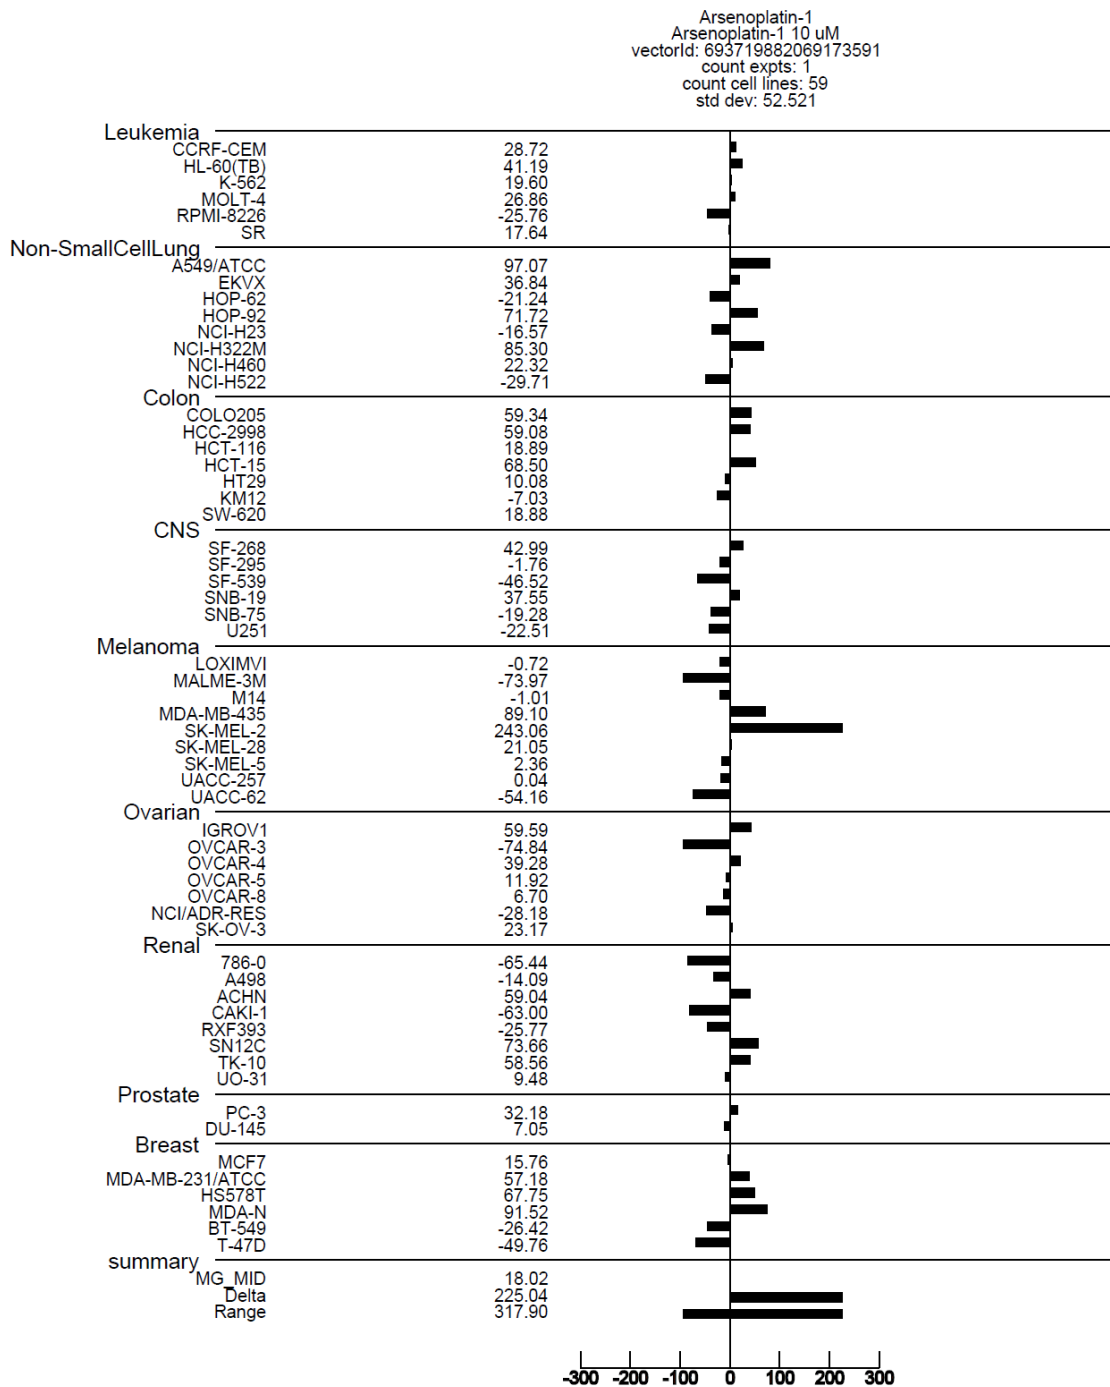

**Figure S4.** NCI-60 human tumor cell lines screen. One dose mean graph for Arsenoplatin-1 (AP-1).



Developmental Therapeutics Program Mean Graph  
Selected Data Vectors

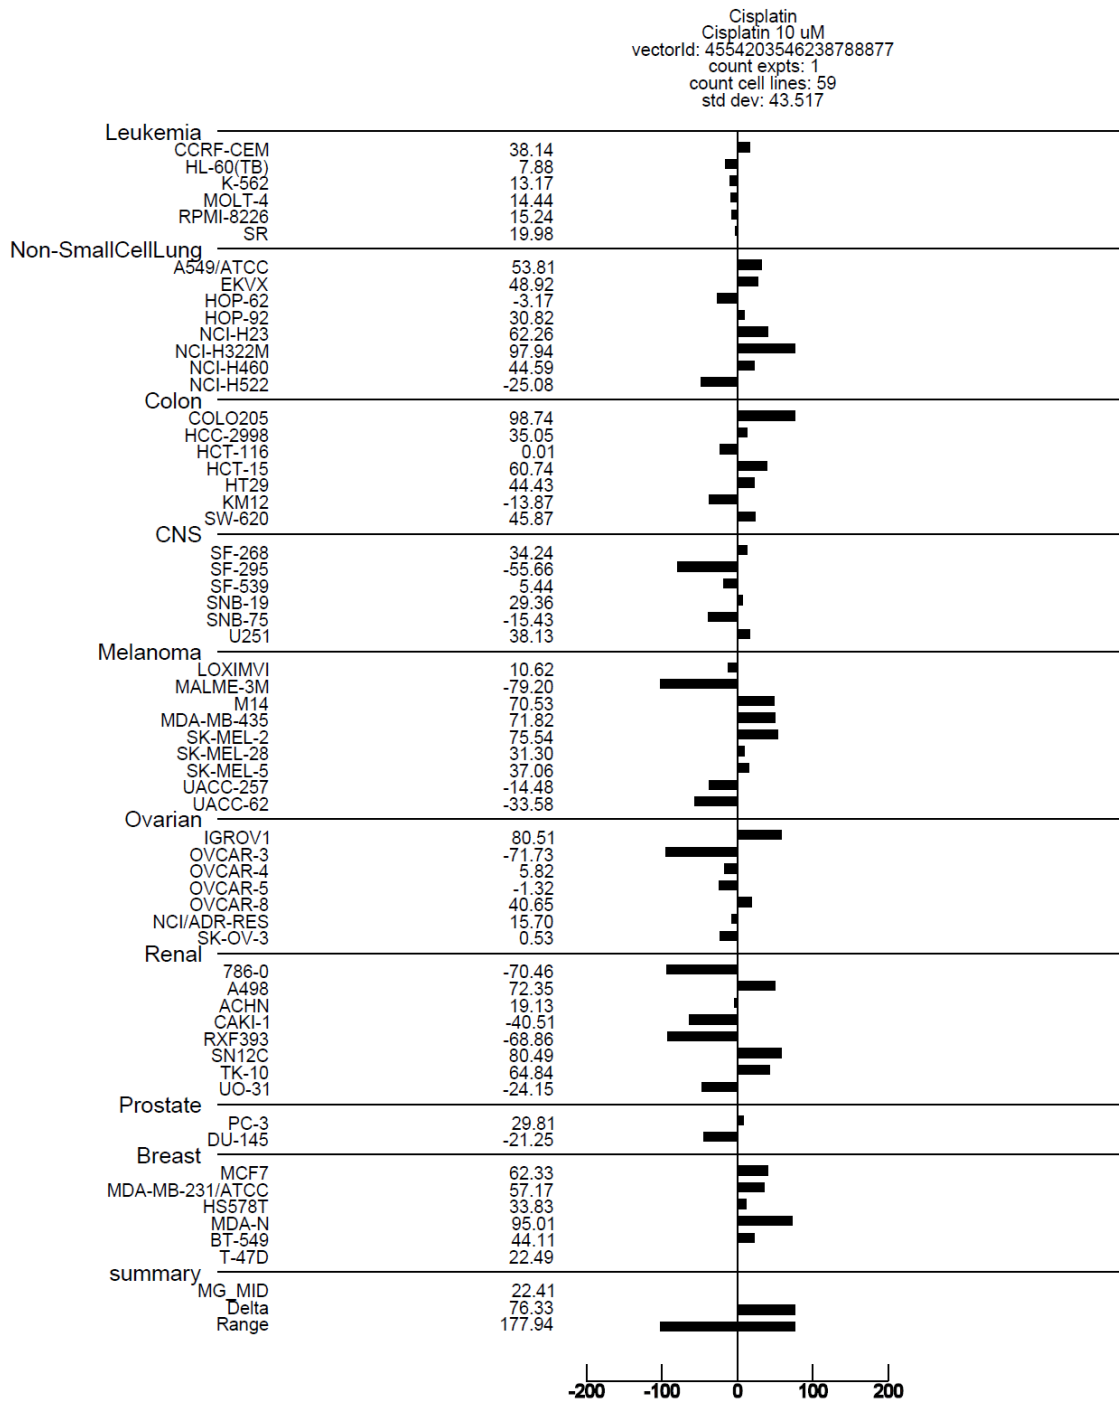

Figure S5. NCI-60 human tumor cell lines screen. One dose mean graph for Cisplatin.

Developmental Therapeutics Program Mean Graph  
Selected Data Vectors

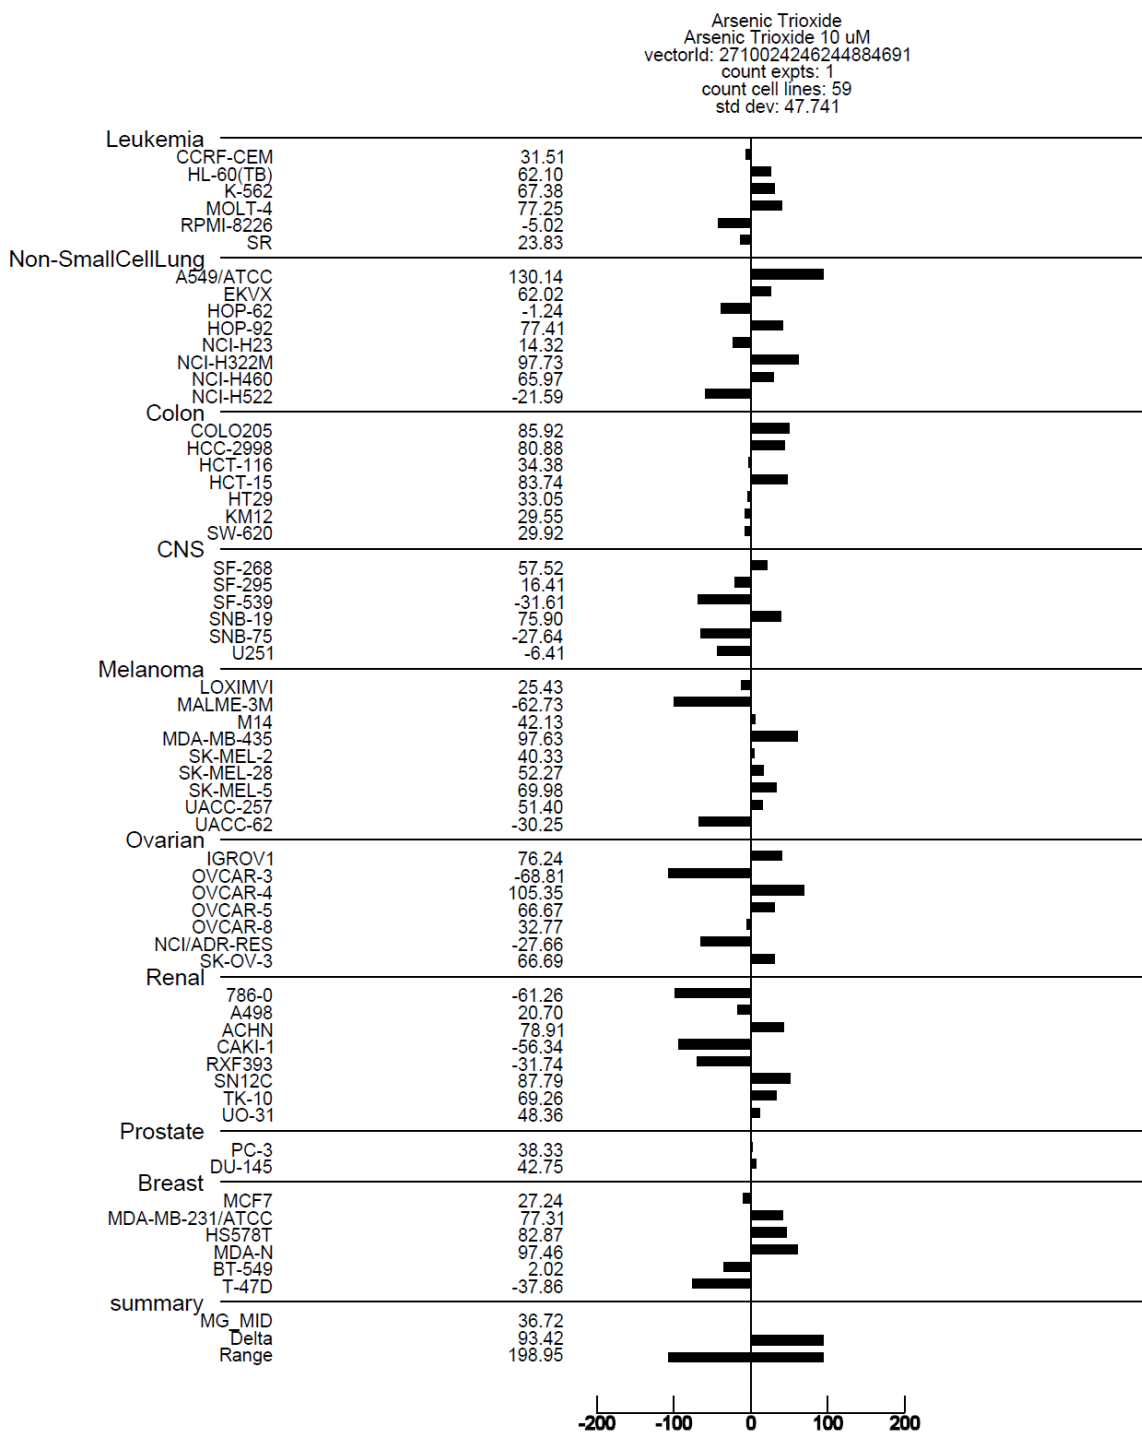

Figure S6. NCI-60 human tumor cell lines screen. One dose mean graph for Arsenic Trioxide.

## NCI-60 Response and Pearson's Correlation Coefficients

Following the NCI protocol<sup>2</sup>, positive values represent the growth percent, and negative values represent the % of lethality of investigated cells in the one dose-mean graphs.

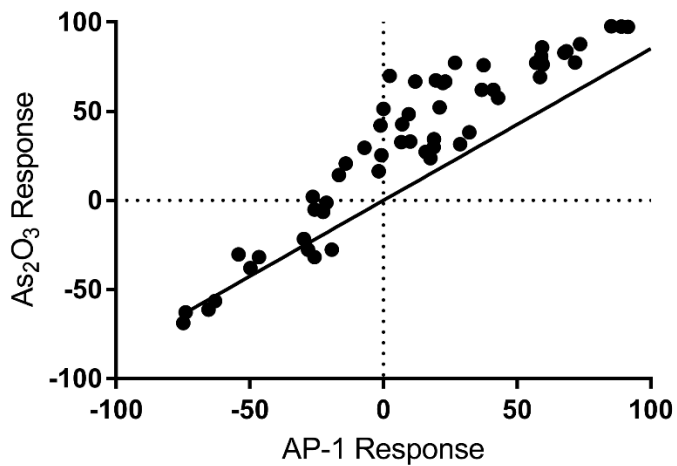

**Figure S7.** AP-1 vs As<sub>2</sub>O<sub>3</sub> response in NCI-60. Pearson's correlation coefficient (PCC) = 0.78.

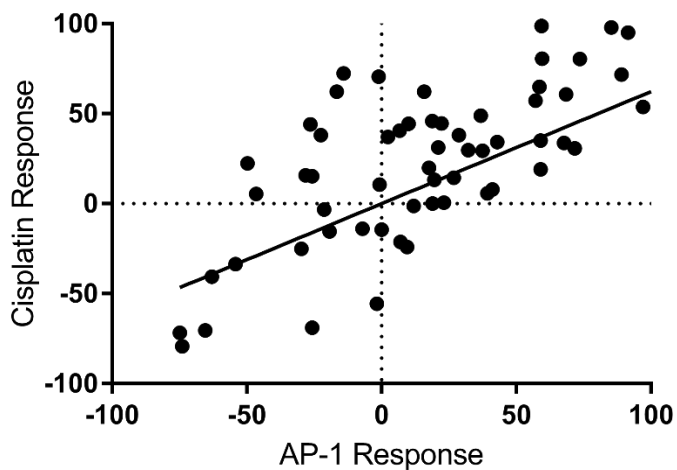

**Figure S8.** AP-1 vs cisplatin response in NCI-60. Pearson's correlation coefficient (PCC) = 0.67.

## ESI-MS Spectra

AP-1 was reacted with lysozyme or RNase A in 20 mM ammonium acetate, pH 6.8. Metal complex to protein ratio was 3:1 with final protein concentration  $10^{-4}$  M. Reaction mixtures were incubated for 72 h at 37 °C. Samples were diluted with LC-MS water at  $10^{-6}$  M protein final concentration and before analysis 0.1% of FoA was also added. Respective ESI-MS spectra were acquired through direct infusion at  $5 \mu\text{l min}^{-1}$  flow rate in a TripleTOF® 5600+ mass spectrometer (Sciex, Framingham, MA, U.S.A.), equipped with a DuoSpray® interface operating with an ESI probe. The ESI source parameters were optimized and were as follows: positive polarity, Ionspray Voltage Floating 5500 V, Ion source Gas 1 (GS1) 40; Curtain Gas (CUR) 25, Declustering Potential (DP) 150 V, Collision Energy (CE) 10 V. For acquisition, Analyst TF software 1.7.1 (Sciex) was used and deconvoluted spectra were obtained by using the Bio Tool Kit micro-application v.2.2 embedded in PeakView™ software v.2.2 (Sciex).

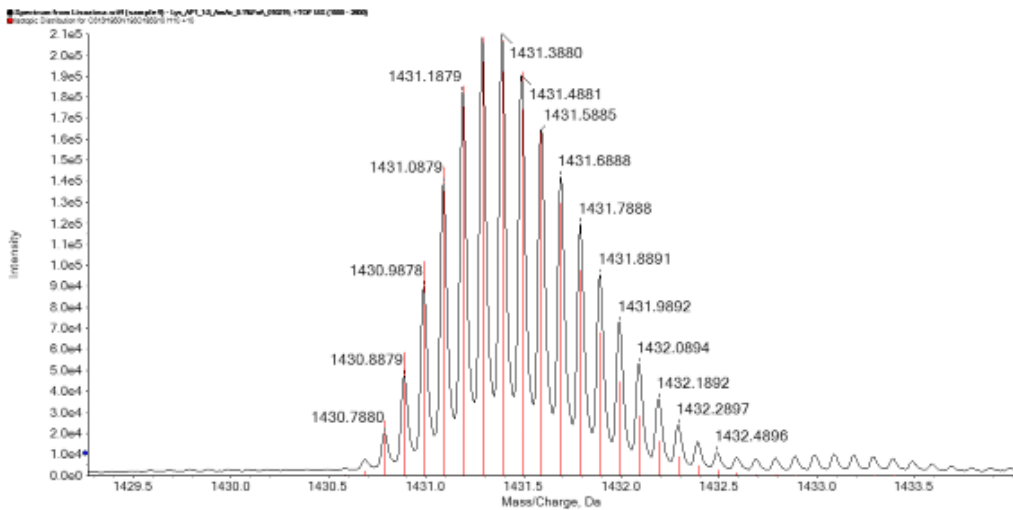

PROTEIN SEQUENCE UNIPROT>sp|P00698|LYSC\_CHICK Lysozyme C OS=Gallus gallus OX=9031  
GN=LYZ PE=1 SV=1  
MRSLLILVLCFLPLAALGKVFGRCELAAAMKRHGLDNRYGYSLGNWVCAAKFESNFNTQA  
TNRNTDGDSTDYGILQINSRWWCNDGRTPGSRNLCNIPCSALLSSDITASVNC AKKIVSDG  
NGMNAWVAWRNRCKGTDVQAWIRGCR L

A)

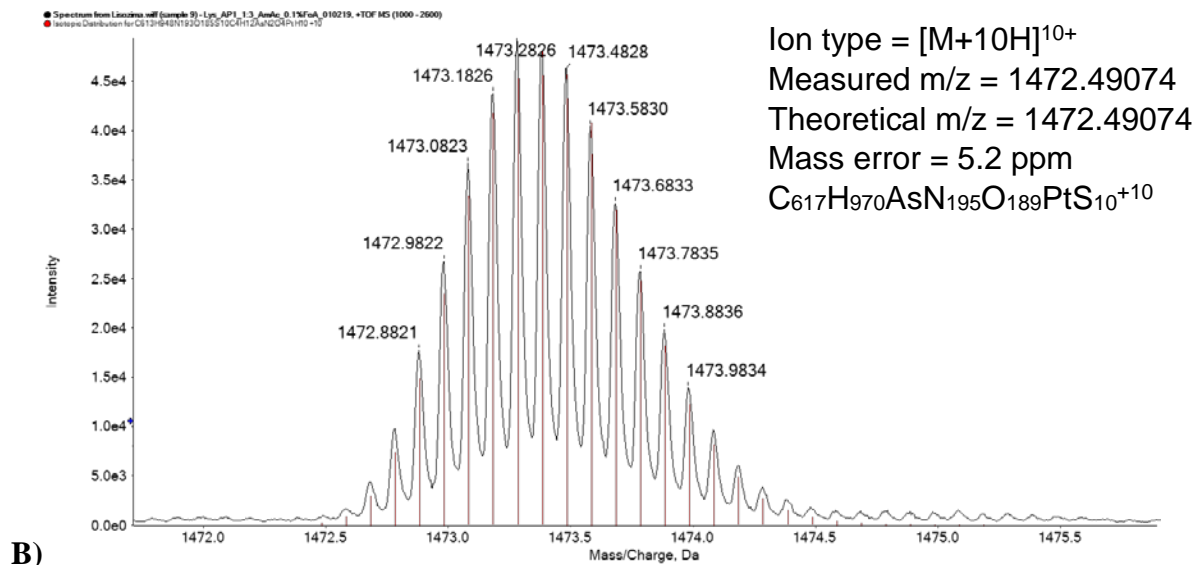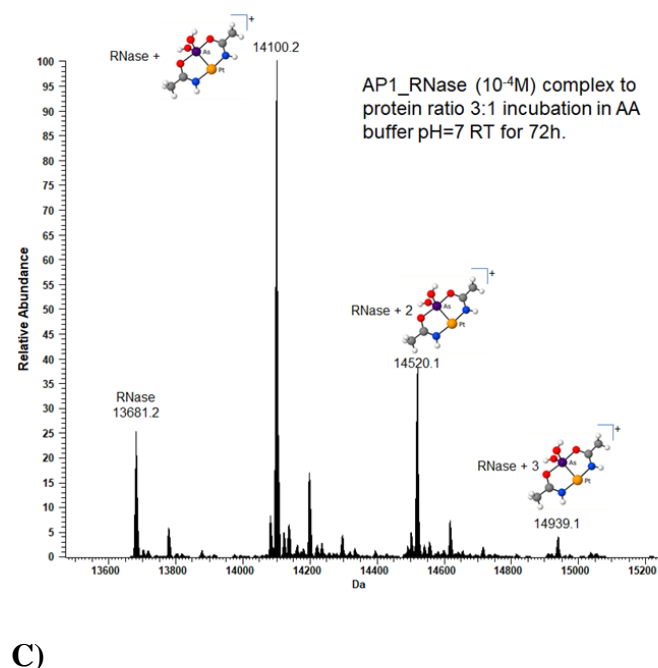

**Figure S9.** **A)** Theoretical simulation of lysozyme isotopic pattern (red) and experimental peak (black) (+10 charge); **B)** Theoretical simulation of AP-1-lysozyme isotopic pattern (red) and experimental peak (+10 charge) **C)** ESI MS spectrum of AP-1 ( $10^{-4}M$ ) incubated for 72 h in 20 mM ammonium acetate buffer (pH=7) in presence of RNase A ( $25^{\circ}C$ ). Complex to protein ratio was 3:1 (mass error calculated for the attribution < 5 ppm).

## Crystallographic Data

### *Crystallization of AP-1 adducts with bovine pancreatic ribonuclease and hen egg white lysozyme*

Bovine pancreatic ribonuclease (RNase A) and hen egg-white lysozyme (HEWL) were purchased from Sigma-Aldrich and used without further purification. RNase A was crystallized using vapor diffusion method and the hanging drop technique using protein at a concentration of 20 mg mL<sup>-1</sup> and a reservoir solution consisting of 22% w/v PEG4K, 10 mM sodium acetate pH 5.1. Crystals of RNase A-AP-1 were formed by soaking pre-grown RNase A crystals for 3 h in a solution containing 5 mM AP-1 dissolved in DMSO and then added to the reservoir. HEWL was crystallized by the vapor diffusion method, using the hanging drop technique and 1 µl of the protein at 20 mg mL<sup>-1</sup> concentration mixed with 1 µl of reservoir solution consisting of 20% ethylene glycol, 0.1 M sodium acetate at pH 4.5, 0.6 M sodium nitrate. Crystals of the HEWL adduct with AP-1 were obtained upon two days soaking of pre-grown HEWL crystals in a solution containing 5 mM AP-1 dissolved in DMSO and added to the crystal mother liquor.

### *Data Collection, structure solution and refinement*

X-ray diffraction data from AP-1 soaked crystals of RNase A and HEWL were collected at the CNR Institute of Biostructures and Bioimages in Naples, Italy using a Cu rotating anode. In all cases, diffraction patterns were recorded at 100 K using a CCD detector with an oscillation range of 1.0 degree per frame, an exposure time of 8.0 s per frame, and a crystal-to-detector distance of 45 mm. In order to avoid possible structural heterogeneities due to the short soak in the cryo-protectant solution, datasets were collected freezing the crystals without a cryoprotectant solution, as previously done in other works.<sup>3-4</sup> Diffraction images have been processed with the HKL2000 program suite.<sup>5</sup> Statistics of the data collection are summarized in Table S2.

The structure of HEWL from PDB code 4J1A<sup>6</sup> and that of RNase A from pdb code 1JVT (chain A)<sup>7</sup> without water molecules and ligands were used as starting models for crystallographic refinements, which have been performed using the program REFMAC5.<sup>7,8</sup> Refinement statistics are summarized in Table S3. Platinum (and thus ligand atoms) occupancies were manually adjusted, until no peaks were observed on Pt center in the difference Fourier (Fo-Fc) electron density maps. Refinements suggest Pt occupancies values in the range 0.60-0.75 with B-factors

values that fall within the range 24.3–49.2 Å<sup>2</sup>. Data were deposited in the Protein Data Bank under the accession codes 5NJ1 and 5NJ7.

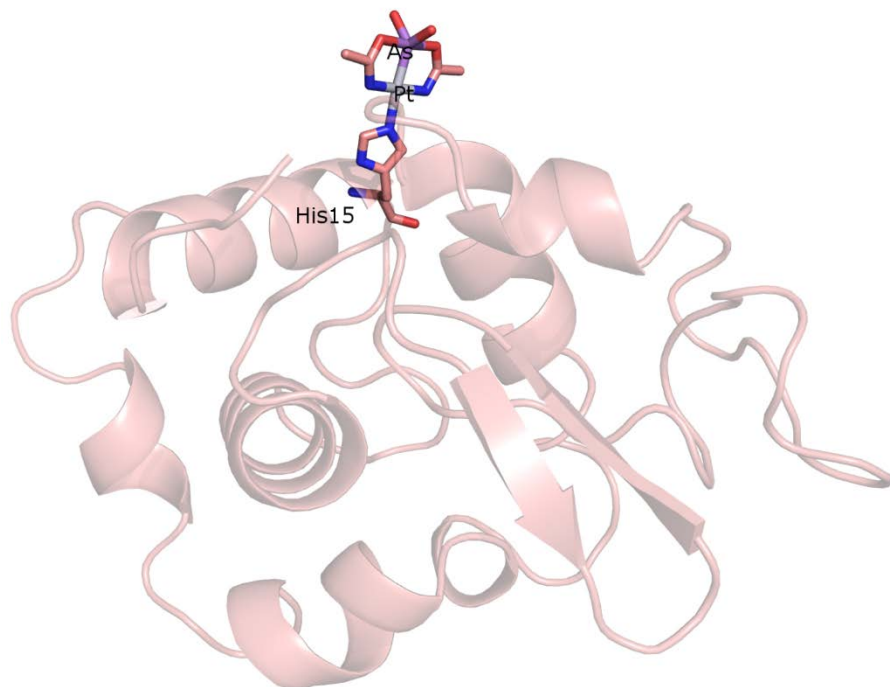

**Figure S10.** Arsenoplatin-1-Lysozyme adduct – ribbon representation of structure (5NJ1)

## Catalytic Activity Assay

Experiments were performed using the Kunitz method<sup>9</sup> at 25 °C in 0.050 M sodium acetate pH 5.0, using  $0.5 \text{ mg} \times \text{mL}^{-1}$  of RNA and enzyme concentration of  $0.5 \text{ } \mu\text{g} \times \text{mL}^{-1}$ .

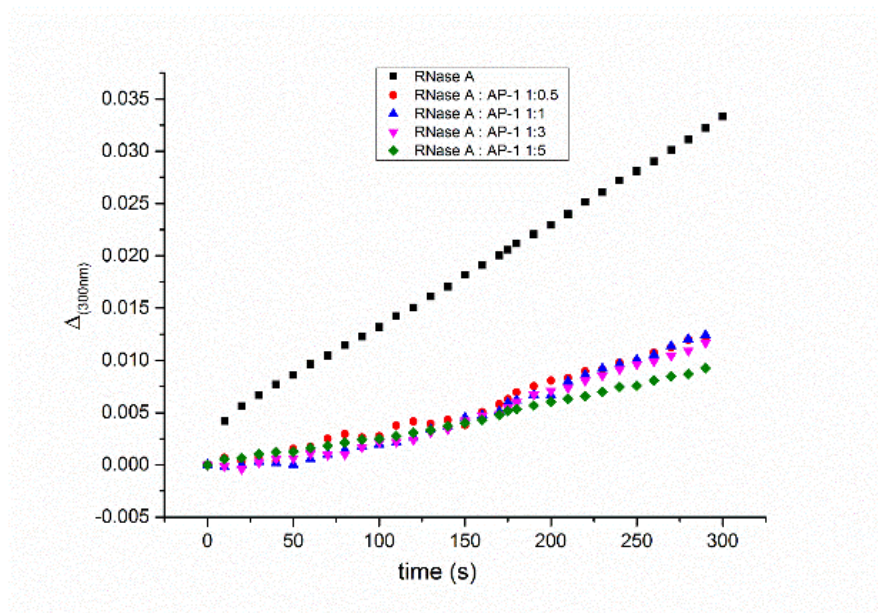

**Figure S11.** Hydrolysis of yeast RNA by RNase A and by RNase A-AP-1 adduct.



## **DNA Isolation and Determination**

MDA-MB-231 (triple negative breast) cancer cells were seeded in 90 mm culture dish plates at the density of approximately  $1 \times 10^6$  cells/mL at 37°C in 5% CO<sub>2</sub>, and have grown until confluence has reached approximately 80%. Cells were exposed to final concentration of 100 μM Cisplatin and Arsenoplatin-1 for 4h and 8h. After exposure, medium with the drugs was removed and cells were washed 3x and left to grow in platinum free medium 12-20 hours (McCoy modified medium). After that period medium was removed, and cells were lysed with DNAzol Reagent (Life Technologies), 0.75-1ml DNAzol per 10 cm<sup>2</sup> culture plate area. The lysate is transferred to 10 mL tubes and centrifuged 10 min at 10,000 g at 4 °C. DNA was precipitated from the lysate by the addition of 100 % ethanol (0.5 mL of 100 % ethanol per 1 ml of DNAzol reagent). DNA was pelleted by centrifugation of sample at 4,000 x g for 5 min at 4°C and washed three times with 75% ethanol. DNA is air dried after removing the ethanol and dissolved in 8 mM NaOH. pH is adjusted to 7.5 using 0.1 M HEPES solution. The purity of the DNA was checked by measuring the absorbance of a solution at 260 and 280 nm using NanoDrop instrument. DNA-adducts were digested with 100 μL concentrated nitric acid (trace metal grade, Fisher Scientific) for measurement of arsenic (As) and platinum (Pt) concentrations by inductively coupled plasma mass spectroscopy (Thermo iCAP Q ICP-MS). The amount of platinum and arsenic in the DNA samples was expressed as pmolPt/As per μg DNA.

## Dose Response Studies

Cell studies were conducted using a modified procedure based on Ahn, et al.<sup>10</sup> Cells were plated at a concentration of 80,000 cells/mL in triplicate (50 - 100  $\mu$ L/well) onto 96 well plates, incubated overnight and then treated with drugs. After 48 hours of drug treatment while incubating at 37°C, MTS cell proliferation assay solution (10 - 20  $\mu$ L/well) was added to each well and the plates were further incubated for 3 - 4 hours at 37°C before reading the absorbance at 490 nm. Cell growth rates were expressed as a function of drug concentration on a logarithmic scale. The EC<sub>50</sub> values (the drug concentration required for 50% inhibition of cell growth) were determined by fitting to a non-linear regression sigmoidal dose-response curve using Graph Pad Prism 5 (GraphPad Software, Inc. La Jolla, CA, USA).

## Synergy Calculations

EC<sub>25</sub>, EC<sub>50</sub>, and EC<sub>75</sub> values (the drug concentration required for 25%, 50%, and 75% inhibition of cell growth, respectively) that were calculated from sigmoidal dose response curves, as well as calculated arsenic and cisplatin only EC<sub>25</sub>, EC<sub>50</sub>, and EC<sub>75</sub> values, were plugged into the Chou-Talalay equation  $CI = \frac{(D)_1}{(Dx)_1} + \frac{(D)_2}{(Dx)_2}$ , where in the denominator, (Dx)<sub>1</sub> is for D<sub>1</sub> "alone" that inhibits a system x%, and (Dx)<sub>2</sub> is for D<sub>2</sub> "alone" that inhibits a system x%. In the numerators, (D)<sub>1</sub> + (D)<sub>2</sub> —in combination also inhibit x%. To deduce the values for (D)<sub>1</sub> and (D)<sub>2</sub> individually, we take the fact that for the combination of two drugs (D)<sub>1</sub> and (D)<sub>2</sub> at the combination ratio of (D)<sub>1</sub>:(D)<sub>2</sub> = P:Q, with (D)<sub>1,2</sub> = (D)<sub>1</sub> + (D)<sub>2</sub>, we get (D)<sub>1</sub> = (D)<sub>1,2</sub>\* [P/(P + Q)] and (D)<sub>2</sub> = (D)<sub>1,2</sub>\* [Q/(P + Q)]. Values above 1 indicate antagonism between the drugs, values of 1 indicate additivity of the drugs, and values below 1 indicate drug synergy.<sup>11</sup>

**Supporting Table S1:**  $^{195}\text{Pt}$  NMR shifts

|                    | Complex                                                                   | $^{195}\text{Pt}$ shift | $\Delta\delta$ (shift upfield upon $\text{Cl}^-$ substitution with DMSO) |
|--------------------|---------------------------------------------------------------------------|-------------------------|--------------------------------------------------------------------------|
| Ref. <sup>1</sup>  | AP-1 (in $\text{DMSO-}d_6$ )                                              | -3589                   |                                                                          |
| This work          | AP-1 (in $\text{CH}_3\text{OH-}d_4$ )                                     | -3625                   |                                                                          |
| Ref. <sup>14</sup> | Cis-[Pt(NH <sub>3</sub> ) <sub>2</sub> Cl <sub>2</sub> ]                  | -2087                   |                                                                          |
|                    | Cis-[Pt(NH <sub>3</sub> ) <sub>2</sub> Cl(S-DMSO)] <sup>+</sup>           | -3145                   | 1058                                                                     |
|                    | <i>trans</i> -[Pt(NH <sub>3</sub> ) <sub>2</sub> Cl <sub>2</sub> ]        | -2086                   |                                                                          |
|                    | <i>trans</i> -[Pt(NH <sub>3</sub> ) <sub>2</sub> (S-DMSO)Cl] <sup>+</sup> | -3112                   | 1026                                                                     |
| Ref. <sup>15</sup> | [Pt(en)Cl <sub>2</sub> ]                                                  | -2345                   |                                                                          |
|                    | [Pt(en)(S-DMSO)Cl] <sup>+</sup>                                           | -3307                   | 962                                                                      |
| Ref. <sup>16</sup> | cis-[PtCl <sub>2</sub> (1,4-(i-Pr) <sub>2</sub> dab)]                     | -2300                   |                                                                          |
|                    | cis-[PtCl(1,4-(i-Pr) <sub>2</sub> -dab)(S-DMSO)] Cl                       | -3150                   | 850                                                                      |
| Ref. <sup>17</sup> | [PtCl <sub>2</sub> (H <sub>2</sub> bim)]                                  | -2319                   |                                                                          |
|                    | [PtCl(S-DMSO)(H <sub>2</sub> bim)] <sup>+</sup>                           | -3161                   | 842                                                                      |

**Supporting Table S2:** IC<sub>50</sub> data from synergy studies

|                                                                                             | As:Cis =<br>4.5:1 | As:Cis<br>= 3:1 | As:Cis<br>=1.5:1 | As:Cis<br>= 1:1 | As:Cis<br>= 0.5:1 | As:Cis<br>= 0.25:1 |
|---------------------------------------------------------------------------------------------|-------------------|-----------------|------------------|-----------------|-------------------|--------------------|
| IC <sub>50</sub> for As <sub>2</sub> O <sub>3</sub> (As)<br>in combination<br>$\mu\text{M}$ | 8.9 $\pm$ .6      | 8.1 $\pm$ .6    | 6.7 $\pm$ 0.6    | 5.5 $\pm$ .6    | 5.2 $\pm$ 0.5     | 3.4 $\pm$ .3       |
| IC <sub>50</sub> for Cisplatin<br>(Cis) in combination<br>$\mu\text{M}$                     | 2.0 $\pm$ 0.1     | 2.7 $\pm$ 0.2   | 4.4 $\pm$ .4     | 5.5 $\pm$ .6    | 10.4 $\pm$ 1      | 13.5 $\pm$ 1       |

Note two rows correspond to the IC<sub>50</sub> from the perspective of arsenic and cisplatin respectively; n=3 with each experiment consisting of 3 replications.

In the same cancer cell line, IC<sub>50</sub> value for As<sub>2</sub>O<sub>3</sub> alone is 9.5 $\pm$ 0.7  $\mu\text{M}$ , for Cisplatin alone 19.3 $\pm$ .6  $\mu\text{M}$ , and for AP-1 alone is 9.5 $\pm$ 0.3  $\mu\text{M}$ <sup>1</sup>.

**Supporting Table S3.** Data collection statistics

| Protein              | HEWL                             | RNase A                   |
|----------------------|----------------------------------|---------------------------|
| Space group          | P4 <sub>3</sub> 2 <sub>1</sub> 2 | C2                        |
| Unit-cell parameters |                                  |                           |
| a, b, c (Å)          | 79.51, 79.51, 35.91              | 100.54, 32.86, 72.94      |
| $\beta$ (°)          | 90.00                            | 90.17                     |
| Molecules per a. u.  | 1                                | 2                         |
| Resolution (Å)       | 56.22-1.85<br>(1.88-1.85)        | 72.94-2.15<br>(2.19-2.15) |
| Observed reflections | 58381                            | 45145                     |
| Unique reflections   | 10091                            | 13274                     |
| Completeness (%)     | 97.7 (87.6)                      | 99.7 (100)                |
| Rmerge <sup>†</sup>  | 0.084 (0.487)                    | 0.117 (0.504)             |
| I/ $\sigma$ (I)      | 24.9 (2.0)                       | 10.0 (2.9)                |
| Multiplicity         | 5.8 (3.4)                        | 3.4 (3.2)                 |

**Supporting Table S4.** Refinement statistics

|                                                          |                                  |                                      |
|----------------------------------------------------------|----------------------------------|--------------------------------------|
| PDB code                                                 | 5NJ1                             | 5NJ7                                 |
| Protein                                                  | HEWL                             | RNase A                              |
| Space group                                              | P4 <sub>3</sub> 2 <sub>1</sub> 2 | C2                                   |
| <i>Unit-cell parameters a, b, c (Å),</i><br><i>β (°)</i> | 79.51, 79.51,<br>35.91<br>90.00  | 100.54, 32.86, 72.94<br>90.17        |
| Molecules per asymmetric unit                            | 1                                | 2                                    |
| Resolution                                               | 56.22-1.85                       | 72.94-2.15                           |
| Number of reflections used in the working set/test set   | 9573/491                         | 12526/681                            |
| R factor/Rfree (%)                                       | 18.2/24.2                        | 18.7/25.0                            |
| Non-H atoms used in the refinement                       | 1181                             | 2116                                 |
| Number of Pt atoms in the structure                      | 1                                | 4 (2 Pt atoms in each RNase A chain) |
| Number of As atoms in the structure                      | 1                                | 4 (2 As atoms in each RNase A chain) |
| Average B-factor                                         | 35.6                             | 33.7                                 |
| Occupancy of Pt atoms                                    | 0.60                             | 0.60/0.60/0.75/0.70                  |
| Occupancy of As atoms                                    | 0.60                             | 0.60/0.60/0.75/0.70                  |
| B-factor of Pt atoms                                     | 24.3                             | 40.8/41.1/43.3/49.2                  |
| B-factor of As atoms                                     | 25.6                             | 54.4/54.7/58.1/66.6                  |
| <i>Ramachandran values</i>                               |                                  |                                      |
| Most favored /Allowed (%)                                | 97.4/2.6                         | 93.6/5.1                             |
| Generously allowed/disallowed (%)                        | 0                                | 1.3                                  |

## Lipinski Rule of Five and log*P* determination

### Measurement of log *P*

Log *P* values are determined by the standard shake-flask method. Briefly, weighted amounts of AP-1 and AP-2 were partitioned between equal volumes of MQ water and n-octanol for 3h at room temperature (25 °C). The concentration of platinum in the aqueous and octanol phase was determined by ICP-MS. The log *P*<sub>o/w</sub> values are calculated as the logarithm of the concentration ratio of the substance in two-phase system using the following equation<sup>18</sup>:

$$\text{Log } P_{o/w} = \log \frac{C_o - C_w}{C_w}$$

### Supporting Table S5. Lipinski rule of five and log*P* values

|                                     | log <i>P</i>                               | Ref.             | Molecular weight (g/mol) | H-bond donors | H-bond acceptors |
|-------------------------------------|--------------------------------------------|------------------|--------------------------|---------------|------------------|
| Cisplatin                           | -2.30 average (-2.19, -2.53, -2.28, -2.27) | <sup>19-20</sup> | 300.01                   | 2             | 2                |
| Oxaliplatin                         | -1.54 average (-1.65, -1.64, -1.39)        | <sup>19-20</sup> | 429.29                   | 4             | 8                |
| Carboplatin                         | -1.64 average (-2.30, -1.39, -1.63)        | <sup>19-20</sup> | 373.06                   | 4             | 6                |
| Satraplatin<br>(in clinical trials) | -0.16                                      | <sup>19</sup>    | 502.30                   | 4             | 6                |
| Arsenoplatin-1                      | -0.99                                      | This work        | 455.56                   | 4             | 6                |
| Arsenoplatin-2 <sup>1</sup>         | -0.18                                      | This work        | 483.62                   | 4             | 6                |

According to the Lipinski's Rule of Five – a compound will have sufficient absorption after oral dosing if contains: not more than 5 hydrogen bond donors (nitrogen or oxygen atoms with one or more hydrogen atoms); not more than 10 hydrogen bond acceptors (nitrogen or oxygen atoms), a molecular weight under 500, and a partition coefficient log *P* less than 5<sup>21-22</sup>.

## References:

1. Miodragović, Đ. U.; Quentzel, J. A.; Kurutz, J. W.; Stern, C. L.; Ahn, R. W.; Kandela, I.; Mazar, A.; O'Halloran, T. V., Robust Structure and Reactivity of Aqueous Arsenous Acid–Platinum(II) Anticancer Complexes. *Angewandte Chemie International Edition* **2013**, *52* (41), 10749-10752.
2. Holbeck, S. L.; Collins, J. M.; Doroshow, J. H., Analysis of Food and Drug Administration–Approved Anticancer Agents in the NCI60 Panel of Human Tumor Cell Lines. *Molecular Cancer Therapeutics* **2010**, *9* (5), 1451-1460.
3. Russo Krauss, I.; Messori, L.; Cinellu, M. A.; Marasco, D.; Sirignano, R.; Merlino, A., Interactions of gold-based drugs with proteins: the structure and stability of the adduct formed in the reaction between lysozyme and the cytotoxic gold(III) compound Auoxo3. *Dalton Transactions* **2014**, *43* (46), 17483-17488.
4. Messori, L.; Cinellu, M. A.; Merlino, A., Protein Recognition of Gold-Based Drugs: 3D Structure of the Complex Formed When Lysozyme Reacts with Aubipyc. *ACS Medicinal Chemistry Letters* **2014**, *5* (10), 1110-1113.
5. Otwinowski, Z.; Minor, W., [20] Processing of X-ray diffraction data collected in oscillation mode. *Methods in Enzymology* **1997**, *276*, 307-326.
6. Vergara, A.; D'Errico, G.; Montesarchio, D.; Mangiapia, G.; Paduano, L.; Merlino, A., Interaction of Anticancer Ruthenium Compounds with Proteins: High-Resolution X-ray Structures and Raman Microscopy Studies of the Adduct between Hen Egg White Lysozyme and AziRu. *Inorganic Chemistry* **2013**, *52* (8), 4157-4159.
7. Vitagliano, L.; Merlino, A.; Zagari, A.; Mazzarella, L., Reversible substrate-induced domain motions in ribonuclease A. *Proteins: Structure, Function, and Bioinformatics* **2002**, *46* (1), 97-104.
8. Murshudov, G. N.; Skubak, P.; Lebedev, A. A.; Pannu, N. S.; Steiner, R. A.; Nicholls, R. A.; Winn, M. D.; Long, F.; Vagin, A. A., REFMAC5 for the refinement of macromolecular crystal structures. *Acta Crystallographica Section D* **2011**, *67* (4), 355-367.
9. Kunitz, M., A SPECTROPHOTOMETRIC METHOD FOR THE MEASUREMENT OF RIBONUCLEASE ACTIVITY. *Journal of Biological Chemistry* **1946**, *164* (2), 563-568.
10. Ahn, C.; Ahn, D., Randomized Clinical Trials in Stroke Research. *Journal of investigative medicine : the official publication of the American Federation for Clinical Research* **2010**, *58* (2), 277-281.
11. Chou, T.-C., Drug Combination Studies and Their Synergy Quantification Using the Chou-Talalay Method. *Cancer Research* **2010**, *70* (2), 440-446.
12. Bednarek, E.; Sitkowski, J.; Kawęcki, R.; Kozerski, L.; Bocian, W.; Pazderski, L.; Priebe, W., Structure and dynamics of methylcis-3,4-diamino-2,3,4,6-tetra-deoxy- $\alpha$ -l-lyxo-hexopyranoside complexes with PtCl<sub>2</sub> and PdCl<sub>2</sub>, by <sup>1</sup>H, <sup>2</sup>H, <sup>13</sup>C, <sup>15</sup>N and <sup>195</sup>Pt NMR spectroscopy in DMSO, CD<sub>3</sub>CN and H<sub>2</sub>O. *Dalton Transactions* **2008**, (31), 4129-4137.
13. Dodoff Nicolay, I.; Kovala-Demertzi, D.; Kubiak, M.; Kuduk-Jaworska, J.; Kochel, A.; Gorneva Galina, A., Dimethyl Sulfoxide Containing Platinum(II) and Palladium(II) Chelate Complexes of Glyoxylic and Pyruvic Acid Thiosemicarbazones. A New Class of Cytotoxic Metal Complexes. In *Zeitschrift für Naturforschung B*, 2006; Vol. 61, p 1110.
14. Sundquist, W. I.; Ahmed, K. J.; Hollis, L. S.; Lippard, S. J., Solvolysis reactions of cis- and trans-diamminedichloroplatinum(II) in dimethyl sulfoxide. Structural characterization and DNA binding of trans-bis(ammine)chloro(DMSO)platinum(1+). *Inorganic Chemistry* **1987**, *26* (10), 1524-1528.
15. Kerrison, S. J. S.; Sadler, P. J., <sup>195</sup>Pt NMR studies of platinum(II) dimethylsulphoxide complexes. *Inorganica Chimica Acta* **1985**, *104* (3), 197-201.
16. Fanizzi, F. P.; Intini, F. P.; Maresca, L.; Natile, G.; Uccello-Barretta, G., Solvolysis of platinum complexes with substituted ethylenediamines in dimethyl sulfoxide. *Inorganic Chemistry* **1990**, *29* (1), 29-33.

17. Casas, J. S.; Castiñeiras, A.; Parajó, Y.; Pérez-Parallé, M. L.; Sánchez, A.; Sánchez-González, A.; Sordo, J., Pd(II) and Pt(II) complexes of 2,2'-biimidazole and its N,N'-dimethyl derivative. The crystal structure of [PtBr(DMSO)}<sub>2</sub>(Me<sub>2</sub>bim)] (Me<sub>2</sub>bim=N,N'-dimethyl-2,2'-biimidazole). *Polyhedron* **2003**, *22* (8), 1113-1121.
18. Foteeva, L. S.; Trofimov, D. A.; Kuznetsova, O. V.; Kowol, C. R.; Arion, V. B.; Keppler, B. K.; Timerbaev, A. R., A quantitative structure–activity approach for lipophilicity estimation of antitumor complexes of different metals using microemulsion electrokinetic chromatography. *Journal of Pharmaceutical and Biomedical Analysis* **2011**, *55* (3), 409-413.
19. Oldfield, S. P.; Hall, M. D.; Platts, J. A., Calculation of Lipophilicity of a Large, Diverse Dataset of Anticancer Platinum Complexes and the Relation to Cellular Uptake. *Journal of Medicinal Chemistry* **2007**, *50* (21), 5227-5237.
20. Screnci, D.; McKeage, M. J.; Galettis, P.; Hambley, T. W.; Palmer, B. D.; Baguley, B. C., Relationships between hydrophobicity, reactivity, accumulation and peripheral nerve toxicity of a series of platinum drugs. *Br J Cancer* **2000**, *82* (4), 966-972.
21. Leeson, P., Drug discovery: Chemical beauty contest. *Nature* **2012**, *481* (7382), 455-456.
22. Kerns, E. H.; Di, L., Chapter 5 - Lipophilicity. In *Drug-like Properties: Concepts, Structure Design and Methods*, Academic Press: San Diego, 2008; pp 43-47.
